# Supplementary material for: The Associated Decision and Management Factors on Cattle Tick Level of Infestation in Two Tropical Areas of Ecuador
Source: MDPI journal article supplement (doi:10.3390/pathogens11040403), 2022-03-26
Supplement: s1 [file s1]

Survey Number

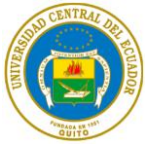

**SOCIO-EPIDEMIOLOGICAL SURVEY: TICKS AND TBD**  
**UNIVERSITY OF LIEGE & CATHOLIC UNIVERSITY OF LOUVAIN**  
**CENTRAL UNIVERSITY OF ECUADOR**  
**Zoonosis Research Institute - CIZ**

**UCLouvain**

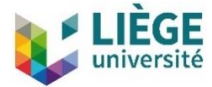

*The researchers request their authorization to participate in the research project entitled: Socio-eco-epidemiology of ticks, tick-borne parasites, resistance to acaricides and residual effects of acaricides in the Ecuadorian tropical cattle: impacts on the environment, public health and animal health. This project consists of: Applying a socio-eco-epidemiological survey. Collect ticks on the animal. Extract blood samples from cattle. And on certain farms collect larvae of ticks, samples of urine, feces, milk and soil. The project is committed to deliver respective results once the samples have been analyzed.*

**SECTION A: INTRODUCTORY SECTION**

Date: \_\_\_\_/\_\_\_\_/\_\_\_\_ Pollster name: \_\_\_\_\_  
 GPS coordinates (gg/mm/ss): latitude \_\_\_\_\_ longitude \_\_\_\_\_ Altitude (masl): \_\_\_\_\_  
 Farm Name: \_\_\_\_\_ Name of the Owner: \_\_\_\_\_  
 Province Pichincha ☐ Napo ☐ Canton S. M. Bancos ☐ Pedro Vicente Maldonado ☐ Quito ☐ El Chaco ☐ Quijos ☐  
 Parish Bancos ☐ PVM ☐ Nanegal ☐ Nanegalito ☐ Guala ☐ Pacto ☐ Baeza ☐ Borja ☐ Sardinas ☐  
 El Chaco ☐ Locality: \_\_\_\_\_  
 Name of respondent: \_\_\_\_\_ Age: \_\_\_\_\_ Gender: F ☐ M ☐  
 Phone/Cell: \_\_\_\_\_  
 Education achieved: No formal education ☐ Primary ☐ High school ☐ Superior ☐ Profession/Activity: \_\_\_\_\_

**SECTION B: EXPLOITATION SYSTEM**

1. What is the total area of the farm? \_\_\_\_\_ (hectares)

| Use        | Surface | Unit (m/ha) |
|------------|---------|-------------|
| Housing    |         |             |
| Cattle pen |         |             |
| Pastures   |         |             |
| Crops      |         |             |

| Use                         | Surface | Unit (m/ha) |
|-----------------------------|---------|-------------|
| Forests within the property |         |             |
| Temporary fallow            |         |             |
| Other: _____                |         |             |
|                             |         |             |

2. Are there forests outside the property? Yes ☐ No ☐ How far are they from the property? \_\_\_\_\_

3. Under what condition of possession does this property consist of?

Own ☐ Co-owner ☐ Leased ☐ Loan ☐ On departure ☐ Other: \_\_\_\_\_

4. Is the owner of the farm a member of any association?

Yes (which) \_\_\_\_\_ No ☐

5. What is the milking mode? Manual ☐ Mechanical ☐

6. Do you use poultry manure or other organic fertilizer as soil fertilizer? Yes ☐ No ☐

7. Do you use mycorrhizae to fertilize? Yes ☐ No ☐

8. Do you use Biol based on slurry to fertilize?

Pastures ☐ Crops ☐ I don't use BIOL ☐

\* If you answer Crops, what crops? \_\_\_\_\_

9. Is the biol used? Prepared by you ☐ Purchased ☐

10. Are there any crops grown on your farm? Yes ☐ No ☐

\* If you answer Yes, continue. If No, skip to question 14

11. What is the number of varieties grown? One ☐ More than one ☐

12. Annual replacement animals

| Bovines            | Heads (N°) | Origin * | Price (\$/animal) |
|--------------------|------------|----------|-------------------|
| Calves             |            |          |                   |
| Calves             |            |          |                   |
| Heifers            |            |          |                   |
| First Calf Heifers |            |          |                   |
| Cows               |            |          |                   |
| Herd Bulls         |            |          |                   |
| Bulls              |            |          |                   |
| Other              |            |          |                   |

ORIGIN: FV= Neighboring farms; F= Fairs; 3 Other (Which)

13. Production parameters

| Parameter                               | Quantity | Unit       |
|-----------------------------------------|----------|------------|
| Months of lactation (average)           |          | Months     |
| Milk production in Dry Season           |          | Lt/cow/day |
| Milk production in Rainy Season         |          | Lt/cow/day |
| Average number of cows milked per month |          | cows/month |
| Average open days                       |          | Days       |

14. Is there a decrease in production yield in dairy cows with ticks? Yes ☐ No ☐

If your answer is Yes, in what quantity/% of the total produced: \_\_\_\_\_

15. Beef cattle with ticks, how long does it take for them to reach sale weight? Age\_\_\_\_ Sales Weight\_\_

16. Productive Parameters (In case of beef cattle or double purpose)

| Parameter                                      | Quantity | Unit    |
|------------------------------------------------|----------|---------|
| Months of fattening (average)                  |          | Months  |
| Average weight at deboning                     |          | Pounds  |
| Average number of animals slaughtered annually |          | Animals |

SECTION F: SANITARY MANAGEMENT

17. Do you move animals between these properties? Yes: ☐ No: ☐

18. Are there other lots for off-site cattle? Yes ☐ No ☐

\* If you answer Yes, continue. If No, skip to question 32.

19. Are these lots? Own ☐ Leased ☐

20. Are the animals moved to these lots? Constantly throughout the year ☐ In certain months ☐  
what months? \_\_\_\_\_

21. What category of animals are mobilized to these lots? \_\_\_\_\_

22. What kind of grass exists in these lots? \_\_\_\_\_

23. After the cattle return from these lots, do they have more or less ticks? More ☐ Less ☐

24. How long the animals spend in these lots? \_\_\_\_\_

25. Do you perform veterinary support? Permanent ☐ Sometimes ☐ Never ☐ Hardly ever ☐

26. The veterinarian that provides technique attendance in your farm is? Private ☐ GAD ☐ MAG ☐

27. Who prescribes the treatment?

Owner ☐ Veterinarian ☐ Farm Store Salesman ☐

Butler ☐Workers ☐Visitor ☐

Other \_\_\_\_\_

**28. Who applies the treatments?**Owner ☐Veterinarian ☐Butler ☐Workers ☐

Other \_\_\_\_\_

**29. Which of these diseases have you observed in your livestock?**

| Illness              | N° animals affected/year | Mortality |   | Categories of cattle concerned |
|----------------------|--------------------------|-----------|---|--------------------------------|
|                      |                          | No        | % |                                |
| Internal parasitosis |                          |           |   |                                |
| Tick fever           |                          |           |   |                                |
| Abortion             |                          |           |   |                                |
| Mastitis             |                          |           |   |                                |
| Metritis             |                          |           |   |                                |
| Placental retention  |                          |           |   |                                |
| Milk fever           |                          |           |   |                                |
| Dystocic labor       |                          |           |   |                                |
| Pneumonia            |                          |           |   |                                |
| Tympanism            |                          |           |   |                                |
| Myiasis              |                          |           |   |                                |
| Nuche (tupe)         |                          |           |   |                                |
| Abscess              |                          |           |   |                                |
| Lameness             |                          |           |   |                                |
| Heat stroke          |                          |           |   |                                |

**30. What do you think is the degree of affection that ticks cause in your animals?**None ☐Low ☐Middle ☐High ☐**31. Did you know that ticks can transmit disease?**Yes ☐No ☐

What diseases? \_\_\_\_\_

**32. Which breeds of animals on your farm have been the most affected by ticks? Breeds: \_\_\_\_\_****33. Do you identify any of them?**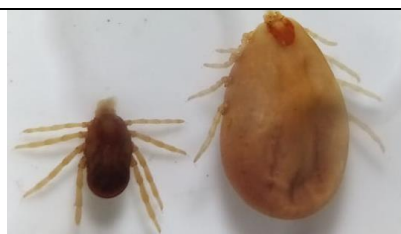*Rhipicephalus microplus*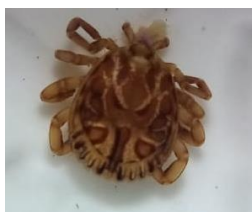*Amblyomma cajennense*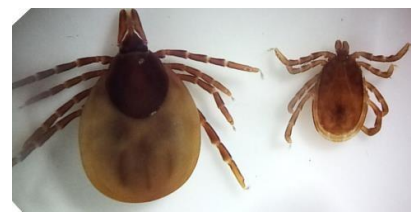*Ixodes boliviensis***34. In which third of the bovine body are ticks most frequent?**Previous Third ☐Middle Third ☐Back Third ☐All ☐

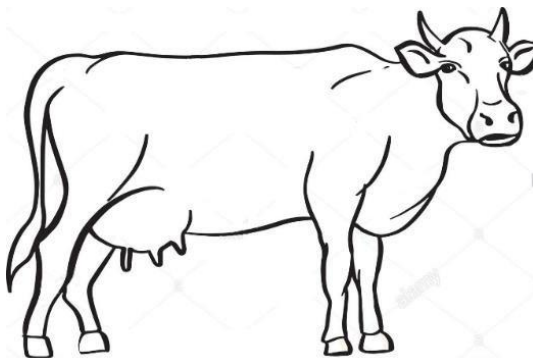

35. When are there more ticks on the cattle on your farm?

Rainy season ☐ All year round ☐ Dry season ☐

Specify in which months: \_\_\_\_\_

36. Do you use chemical remedies to control ectoparasites in livestock on your farm?

Yes ☐ No ☐

\* If you answer Yes, continue. If No, skip to question 51

37. Do you calibrate the spraying equipment? Yes ☐ No ☐

Every so often? \_\_\_\_\_

38. Who prepares the solutions with the acaricide? Veterinarian ☐ Owner ☐ Workers ☐

39. What water do you use to dissolve the acaricide?

Drinking water ☐ Irrigation ☐ River ☐ Bottled water ☐

40. What are the rotation dynamics of the acaricides used? \_\_\_\_\_  
\_\_\_\_\_

41. Which of the following acaricides do you use or have you used on your farm?

#### Organophosphates:

| Trade name                                | Frequency of use        | Application                     | This product was.....                                                                                                         |  |
|-------------------------------------------|-------------------------|---------------------------------|-------------------------------------------------------------------------------------------------------------------------------|--|
| Nuvan                                     | Less than one month     | In immersion baths              | Lately used                                                                                                                   |  |
| Neguvon                                   | Between 1 and 2 months  | By spraying with pump           | Used some time ago                                                                                                            |  |
| Asuntol                                   | Between 3 and 6 months  | Injected                        | Uses for a long time                                                                                                          |  |
| Diclorvos                                 | More than 6 months      | Pour on                         | <b>Treated animals</b><br><br>All                      Only those affected<br><br>Dry cattle              Calves<br><br>Bulls |  |
| Garafos                                   | <b>Dosage:</b>          | Cleaning with cleaner           |                                                                                                                               |  |
| Matanuche                                 | <b>Duration of Tto.</b> | <b>Retirement time</b>          |                                                                                                                               |  |
|                                           | <b>Efficacy (%)</b>     | Milk      Meat                  |                                                                                                                               |  |
| <b>What do I use before this product?</b> |                         | <b>How long did you use it?</b> |                                                                                                                               |  |

#### Pyrethroids

| Trade name                                | Frequency of use        | Application                     | This product was.....                                                                                                        |  |
|-------------------------------------------|-------------------------|---------------------------------|------------------------------------------------------------------------------------------------------------------------------|--|
| Nuvan                                     | Less than one month     | In immersion baths              | Lately used                                                                                                                  |  |
| Neguvon                                   | Between 1 and 2 months  | By spraying with pump           | Used some time ago                                                                                                           |  |
| Asuntol                                   | Between 3 and 6 months  | Injected                        | Uses for a long time                                                                                                         |  |
| Diclorvos                                 | More than 6 months      | Pour on                         | <b>Treated animals</b><br><br>All                      Only those affected<br><br><b>Retirement time</b> Calves<br><br>Bulls |  |
| Garafos                                   | <b>Dosage:</b>          | Cleaning with cleaner           |                                                                                                                              |  |
| Matanuche                                 | <b>Duration of Tto.</b> | <b>Retirement time</b>          |                                                                                                                              |  |
|                                           | <b>Efficacy (%)</b>     | Milk                      Milk  |                                                                                                                              |  |
| <b>What do I use before this product?</b> |                         | <b>How long did you use it?</b> |                                                                                                                              |  |

#### Amitraz

| Trade name                                | Frequency of use        | Application                     | This product was.....                                                            |
|-------------------------------------------|-------------------------|---------------------------------|----------------------------------------------------------------------------------|
| Nuvan                                     | Less than one month     | In immersion baths              | Lately used                                                                      |
| Neguvon                                   | Between 1 and 2 months  | By spraying with pump           | Used some time ago                                                               |
| Asuntol                                   | Between 3 and 6 months  | Injected                        | Uses for a long time                                                             |
| Diclorvos                                 | More than 6 months      | Pour on                         | <b>Treated animals</b><br>All                      Only those affected<br>Calves |
| Garafo                                    | <b>Dosage:</b>          | Cleaning with cleaner           |                                                                                  |
| Matanuche                                 | <b>Duration of Tto.</b> | <b>Retirement time</b>          |                                                                                  |
|                                           | <b>Efficacy (%)</b>     | Milk              Milk          | Bulls                                                                            |
| <b>What do I use before this product?</b> |                         | <b>How long did you use it?</b> |                                                                                  |

#### Ivermectins

| Trade name                                | Frequency of use        | Application                     | This product was.....                                                            |
|-------------------------------------------|-------------------------|---------------------------------|----------------------------------------------------------------------------------|
| Nuvan                                     | Less than one month     | In immersion baths              | Lately used                                                                      |
| Neguvon                                   | Between 1 and 2 months  | By spraying with pump           | Used some time ago                                                               |
| Asuntol                                   | Between 3 and 6 months  | Injected                        | Uses for a long time                                                             |
| Diclorvos                                 | More than 6 months      | Pour on                         | <b>Treated animals</b><br>All                      Only those affected<br>Calves |
| Garafo                                    | <b>Dosage:</b>          | Cleaning with cleaner           |                                                                                  |
| Matanuche                                 | <b>Duration of Tto.</b> | <b>Retirement time</b>          |                                                                                  |
|                                           | <b>Efficacy (%)</b>     | Milk              Milk          | Bulls                                                                            |
| <b>What do I use before this product?</b> |                         | <b>How long did you use it?</b> |                                                                                  |

#### Fipronil

| Trade name                                | Frequency of use        | Application                     | This product was.....                                                            |
|-------------------------------------------|-------------------------|---------------------------------|----------------------------------------------------------------------------------|
| Nuvan                                     | Less than one month     | In immersion baths              | Lately used                                                                      |
| Neguvon                                   | Between 1 and 2 months  | By spraying with pump           | Used some time ago                                                               |
| Asuntol                                   | Between 3 and 6 months  | Injected                        | Uses for a long time                                                             |
| Diclorvos                                 | More than 6 months      | Pour on                         | <b>Treated animals</b><br>All                      Only those affected<br>Calves |
| Garafo                                    | <b>Dosage:</b>          | Cleaning with cleaner           |                                                                                  |
| Matanuche                                 | <b>Duration of Tto.</b> | <b>Retirement time</b>          |                                                                                  |
|                                           | <b>Efficacy (%)</b>     | Milk              Milk          | Bulls                                                                            |
| <b>What do I use before this product?</b> |                         | <b>How long did you use it?</b> |                                                                                  |

#### Luazuron (Chitin Inhibitor)

| Trade name                                | Frequency of use        | Application                     | This product was.....                                                            |
|-------------------------------------------|-------------------------|---------------------------------|----------------------------------------------------------------------------------|
| Nuvan                                     | Less than one month     | In immersion baths              | Lately used                                                                      |
| Neguvon                                   | Between 1 and 2 months  | By spraying with pump           | Used some time ago                                                               |
| Asuntol                                   | Between 3 and 6 months  | Injected                        | Uses for a long time                                                             |
| Diclorvos                                 | More than 6 months      | Pour on                         | <b>Treated animals</b><br>All                      Only those affected<br>Calves |
| Garafo                                    | <b>Dosage:</b>          | Cleaning with cleaner           |                                                                                  |
| Matanuche                                 | <b>Duration of Tto.</b> | <b>Retirement time</b>          |                                                                                  |
|                                           | <b>Efficacy (%)</b>     | Milk              Milk          | Bulls                                                                            |
| <b>What do I use before this product?</b> |                         | <b>How long did you use it?</b> |                                                                                  |

#### Combinados Amitraz-Piretroides

| Trade name | Frequency of use       | Application           | This product was..... |
|------------|------------------------|-----------------------|-----------------------|
| Nuvan      | Less than one month    | In immersion baths    | Lately used           |
| Neguvon    | Between 1 and 2 months | By spraying with pump | Used some time ago    |

|                                           |                         |                                 |                        |
|-------------------------------------------|-------------------------|---------------------------------|------------------------|
| Asuntol                                   | Between 3 and 6 months  | Injected                        | Uses for a long time   |
| Diclorvos                                 | More than 6 months      | Pour on                         | <b>Treated animals</b> |
| Garaños                                   | <b>Dosage:</b>          | Cleaning with cleaner           |                        |
| Matanuche                                 | <b>Duration of Tto.</b> | <b>Retirement time</b>          | <b>Retirement time</b> |
|                                           | <b>Efficacy (%)</b>     |                                 |                        |
|                                           |                         | Milk Milk                       | Bulls Calves           |
| <b>What do I use before this product?</b> |                         | <b>How long did you use it?</b> |                        |

#### Combinados Piretroides – Organophosphates

| Trade name                                | Frequency of use        | Application                     | This product was.....  |
|-------------------------------------------|-------------------------|---------------------------------|------------------------|
| Nuvan                                     | Less than one month     | In immersion baths              | Lately used            |
| Neguvon                                   | Between 1 and 2 months  | By spraying with pump           | Used some time ago     |
| Asuntol                                   | Between 3 and 6 months  | Injected                        | Uses for a long time   |
| Diclorvos                                 | More than 6 months      | Pour on                         | <b>Treated animals</b> |
| Garaños                                   | <b>Dosage:</b>          | Cleaning with cleaner           |                        |
| Matanuche                                 | <b>Duration of Tto.</b> | <b>Retirement time</b>          | <b>Retirement time</b> |
|                                           | <b>Efficacy (%)</b>     |                                 |                        |
|                                           |                         | Milk Milk                       | Bulls Calves           |
| <b>What do I use before this product?</b> |                         | <b>How long did you use it?</b> |                        |

#### Combinados Piretroides – Organophosphates-Fipronil

| Trade name                                | Frequency of use        | Application                     | This product was.....  |
|-------------------------------------------|-------------------------|---------------------------------|------------------------|
| Nuvan                                     | Less than one month     | In immersion baths              | Lately used            |
| Neguvon                                   | Between 1 and 2 months  | By spraying with pump           | Used some time ago     |
| Asuntol                                   | Between 3 and 6 months  | Injected                        | Uses for a long time   |
| Diclorvos                                 | More than 6 months      | Pour on                         | <b>Treated animals</b> |
| Garaños                                   | <b>Dosage:</b>          | Cleaning with cleaner           |                        |
| Matanuche                                 | <b>Duration of Tto.</b> | <b>Retirement time</b>          | <b>Retirement time</b> |
|                                           | <b>Efficacy (%)</b>     |                                 |                        |
|                                           |                         | Milk Milk                       | Bulls Calves           |
| <b>What do I use before this product?</b> |                         | <b>How long did you use it?</b> |                        |

42. Where do you purchase used acaricides? Visitor ☐ Informal market ☐ Agricultural store ☐

43. Products used have sanitary registration (Verification) Yes ☐ No ☐

44. Do you use any alternative methods for tick control?

|                                    |                          |                                        |                          |
|------------------------------------|--------------------------|----------------------------------------|--------------------------|
| Use of birds, insects and/or fungi | <input type="checkbox"/> | Flooding of pastures                   | <input type="checkbox"/> |
| Pasture rotation                   | <input type="checkbox"/> | Burning of pastures                    | <input type="checkbox"/> |
| Baths with medicinal plants        | <input type="checkbox"/> | Transhumance                           | <input type="checkbox"/> |
| Planting repellent plants          | <input type="checkbox"/> | Spraying of Garrapaticides on pastures | <input type="checkbox"/> |
| Use of burned oil (Kerosene)       | <input type="checkbox"/> | Vaccination                            | <input type="checkbox"/> |
| Crossbreeding of breeds            | <input type="checkbox"/> | Sulphur baths                          | <input type="checkbox"/> |

Products used: Brief description and frequency of the method used: \_\_\_\_\_

#### SECTION C: PRODUCTION

**45. What is the cattle production aptitude of your farm?**

Milk ☐ Meat ☐ Mixed or Double Purpose ☐

**46.**

**47. Destination of milk production**

| Destiny                | Quantity (lt) | Frequency of sale | Price (\$/lt)  |
|------------------------|---------------|-------------------|----------------|
| Regional dairy plant   |               |                   |                |
| Local dairy plant      |               |                   |                |
| Cheese factories       |               |                   |                |
| Farm industrialization |               |                   |                |
| Calf rearing           |               |                   | NOT APPLICABLE |
| Human consumption      |               |                   | NOT APPLICABLE |
| Direct sale            |               |                   |                |
| Other destination:     |               |                   |                |

**In case of industrialization on the property:**

| Product | Quantity of milk used (lt) | N° Product obtained | Frequency of production | Sale price (\$/Unit) |
|---------|----------------------------|---------------------|-------------------------|----------------------|
|         |                            |                     |                         |                      |
|         |                            |                     |                         |                      |
|         |                            |                     |                         |                      |
|         |                            |                     |                         |                      |

**48. Sale of Beef Cattle**

|                           | N° Heads Sold | Frequency of sale | Average weight at the post or sale (kg) | Destination | Price (\$/Unit) |
|---------------------------|---------------|-------------------|-----------------------------------------|-------------|-----------------|
| Calf for fattening        |               |                   |                                         |             |                 |
| Steer for fattening       |               |                   |                                         |             |                 |
| Cows/ Replacement Heifers |               |                   |                                         |             |                 |
| Cows-Culled               |               |                   |                                         |             |                 |
| Finished Cattle           |               |                   |                                         |             |                 |
| Bulls-Culled              |               |                   |                                         |             |                 |

**UNIT:** Animal-Pound-Kilogram

**49. In case you have pigs/poultry/fish answer:**

| Category       | Sale standing |           |         | To retailer on premises (foot) |           |         | Direct sales in pounds |           |         | Butcher's |           |         |
|----------------|---------------|-----------|---------|--------------------------------|-----------|---------|------------------------|-----------|---------|-----------|-----------|---------|
|                | No            | Frequency | \$/Unit | No                             | Frequency | \$/Unit | No                     | Frequency | \$/Unit | No        | Frequency | \$/Unit |
| Piglets        |               |           |         |                                |           |         |                        |           |         |           |           |         |
| Sows           |               |           |         |                                |           |         |                        |           |         |           |           |         |
| Fattening pigs |               |           |         |                                |           |         |                        |           |         |           |           |         |
| Boars          |               |           |         |                                |           |         |                        |           |         |           |           |         |

| Category  | Sale standing |           |         | To retailer on premises (foot) |           |         | Direct sales in pounds |           |         | Butcher's |           |         |
|-----------|---------------|-----------|---------|--------------------------------|-----------|---------|------------------------|-----------|---------|-----------|-----------|---------|
|           | No            | Frequency | \$/Unit | No                             | Frequency | \$/Unit | No                     | Frequency | \$/Unit | No        | Frequency | \$/Unit |
| Layers    |               |           |         |                                |           |         |                        |           |         |           |           |         |
| Breeders  |               |           |         |                                |           |         |                        |           |         |           |           |         |
| Fattening |               |           |         |                                |           |         |                        |           |         |           |           |         |

| Number of fish harvested | Selfconsumption (lb) | Sale |
|--------------------------|----------------------|------|
|--------------------------|----------------------|------|

| (monthly) | No | lb | (\$/lb) |
|-----------|----|----|---------|
|           |    |    |         |
|           |    |    |         |
|           |    |    |         |

#### SECTION D: LABOR, CONSUMABLES AND MISCELLANEOUS EXPENSES

50. Is there family labor in day-to-day tasks?? Yes ☐ No

\* If you answer **Yes**, continue. If **No**, skip to question 58

#### 51. Family composition and occupation

| Family Relationship | Age (years) | Sex (F/M) | Main activity on the farm | When?        |                  | Do you get paid for the work done? |                            | Activities outside the farm | Payment/Income (\$/Frequency*) |
|---------------------|-------------|-----------|---------------------------|--------------|------------------|------------------------------------|----------------------------|-----------------------------|--------------------------------|
|                     |             |           |                           | Hours to day | Days to the Week | No                                 | Yes (Payment \$/Frequency) |                             |                                |
|                     |             |           |                           |              |                  |                                    |                            |                             |                                |
|                     |             |           |                           |              |                  |                                    |                            |                             |                                |
|                     |             |           |                           |              |                  |                                    |                            |                             |                                |
|                     |             |           |                           |              |                  |                                    |                            |                             |                                |

\*Frequency: Monthly-Weekly-Daily

52. Are the workers on your farm? Occasional ☐ Permanent ☐

\* If you answer **Permanent**, continue. If you answer **Occasional**, skip to question 60

#### 53. Compensation of workers

| N° of workers | Hours worked per day | Days worked per month | Pay (\$/Frequency) | Extra bonus |
|---------------|----------------------|-----------------------|--------------------|-------------|
|               |                      |                       |                    |             |
|               |                      |                       |                    |             |
|               |                      |                       |                    |             |

\*Frequency: Monthly-Weekly-Daily

#### 54. Who performs these internships?

| Activity                                         | N° of animals | Frequency | Persons performing the activity |       |                          | Time spent (Hours/Frequency) | Payment (\$/Unit***) |
|--------------------------------------------------|---------------|-----------|---------------------------------|-------|--------------------------|------------------------------|----------------------|
|                                                  |               |           | Sexo (F/M)                      | Who?* | N° of people by activity |                              |                      |
| <b>LIVESTOCK MANAGEMENT</b>                      |               |           |                                 |       |                          |                              |                      |
| Cattle branding/marking                          |               |           |                                 |       |                          |                              |                      |
| Dehorning                                        |               |           |                                 |       |                          |                              |                      |
| Castration                                       |               |           |                                 |       |                          |                              |                      |
| Weight registration                              |               |           |                                 |       |                          |                              |                      |
| Herding cattle                                   |               |           |                                 |       |                          |                              |                      |
| Milking cows                                     |               |           |                                 |       |                          |                              |                      |
| <b>SANITARY CONTROL</b>                          |               |           |                                 |       |                          |                              |                      |
| Bathing Cattle (Ticks)                           |               |           |                                 |       |                          |                              |                      |
| Manual removal of ticks                          |               |           |                                 |       |                          |                              |                      |
| Wipe the animal with a cleaner with tick killer. |               |           |                                 |       |                          |                              |                      |
| Deworming                                        |               |           |                                 |       |                          |                              |                      |
| Vaccination                                      |               |           |                                 |       |                          |                              |                      |
| Diagnosis/treatment of disease (Veterinary care) |               |           |                                 |       |                          |                              |                      |



|                                                                                                                   |                |  |  |  |  |  |  |
|-------------------------------------------------------------------------------------------------------------------|----------------|--|--|--|--|--|--|
| <b>REPRODUCTIVE ACTIVITIES</b>                                                                                    |                |  |  |  |  |  |  |
| Insemination                                                                                                      |                |  |  |  |  |  |  |
| Synchronize heats                                                                                                 |                |  |  |  |  |  |  |
| Pregnancy test (palpation)                                                                                        |                |  |  |  |  |  |  |
| Pregnancy test (ultrasound)                                                                                       |                |  |  |  |  |  |  |
| Other _____                                                                                                       |                |  |  |  |  |  |  |
| <b>INSTALLATION MAINTENANCE</b>                                                                                   |                |  |  |  |  |  |  |
| Raising fences                                                                                                    | NOT APPLICABLE |  |  |  |  |  |  |
| Cleaning of corrals                                                                                               | NOT APPLICABLE |  |  |  |  |  |  |
| Cleaning of paddocks                                                                                              | NOT APPLICABLE |  |  |  |  |  |  |
| Cleaning of milking parlor                                                                                        | NOT APPLICABLE |  |  |  |  |  |  |
| <b>FEEDING</b>                                                                                                    |                |  |  |  |  |  |  |
| Silage                                                                                                            | NOT APPLICABLE |  |  |  |  |  |  |
| Haymaking                                                                                                         | NOT APPLICABLE |  |  |  |  |  |  |
| cut and carry pasture                                                                                             | NOT APPLICABLE |  |  |  |  |  |  |
| Offer feed/by-products                                                                                            |                |  |  |  |  |  |  |
| Feeding calves                                                                                                    |                |  |  |  |  |  |  |
| Other:                                                                                                            |                |  |  |  |  |  |  |
| *Frequency: Monthly-Weekly-Daily **Who: Veterinarian-Butler-Worker-Owner ***Unit: Daily-Per Visit- Per N° Animals |                |  |  |  |  |  |  |

### 55. Procurement of inputs.

| Input                 | Name | Quantity | Frequency of purchase* | Cost (\$/unit) |
|-----------------------|------|----------|------------------------|----------------|
| Detergents            |      |          |                        |                |
| Sealants              |      |          |                        |                |
| Mastitis Test         |      |          |                        |                |
| Drying towels         |      |          |                        |                |
| Semen                 |      |          |                        |                |
| Analgesic             |      |          |                        |                |
| Antibiotics           |      |          |                        |                |
|                       |      |          |                        |                |
|                       |      |          |                        |                |
| Disinfectants         |      |          |                        |                |
|                       |      |          |                        |                |
| Healing               |      |          |                        |                |
|                       |      |          |                        |                |
| Hormones              |      |          |                        |                |
|                       |      |          |                        |                |
|                       |      |          |                        |                |
| Minerals (Injectable) |      |          |                        |                |
| Vaccines              |      |          |                        |                |
|                       |      |          |                        |                |
|                       |      |          |                        |                |
| Vitamins              |      |          |                        |                |
|                       |      |          |                        |                |
|                       |      |          |                        |                |
| Internal and external |      |          |                        |                |

|                        |  |  |  |  |
|------------------------|--|--|--|--|
| dewormers              |  |  |  |  |
| Restoratives (serums)  |  |  |  |  |
| Fertilizers            |  |  |  |  |
|                        |  |  |  |  |
|                        |  |  |  |  |
| Phytosanitary products |  |  |  |  |
|                        |  |  |  |  |
|                        |  |  |  |  |

\*Frequency: Annual-Monthly-Weekly-Daily

#### 56. Food supplement

| Supplement           | Quantity Purchased | Frequency purchase | Cost (\$/Unit) |
|----------------------|--------------------|--------------------|----------------|
| Balanced cows        |                    |                    |                |
| Calf feed            |                    |                    |                |
| Overfeed             |                    |                    |                |
| Calf substitute      |                    |                    |                |
| Mineral salts        |                    |                    |                |
| Banana rejection     |                    |                    |                |
| Palm heart rejection |                    |                    |                |
| Silo                 |                    |                    |                |
| Hay                  |                    |                    |                |
| Other.....           |                    |                    |                |

#### 57. Annual farm costs

| Item                   | Quantity | Estimated Value (\$/Unit) | Years of useful life | Years in use | Maintenance cost (\$/Frequency) |
|------------------------|----------|---------------------------|----------------------|--------------|---------------------------------|
| Milking equipment      |          |                           |                      |              |                                 |
| Cooling tank           |          |                           |                      |              |                                 |
| Corrals/Stablos/Mangas |          |                           |                      |              |                                 |
| Cellar                 |          |                           |                      |              |                                 |
| Electric fence         |          |                           |                      |              |                                 |
| Tractor                |          |                           |                      |              |                                 |
| Irrigation equipment   |          |                           |                      |              |                                 |
| Fumigation pump        |          |                           |                      |              |                                 |
| Scythe                 |          |                           |                      |              |                                 |
| Grinder                |          |                           |                      |              |                                 |
| Biodigester            |          |                           |                      |              |                                 |
| Water pump             |          |                           |                      |              |                                 |
| Others:                |          |                           |                      |              |                                 |

#### 58. Payments to third parties

| Item                       | Cost | Frequency |
|----------------------------|------|-----------|
| Electricity                |      |           |
| Water                      |      |           |
| Mobilization               |      |           |
| Laboratory services        |      |           |
| Land/pasture lease payment |      |           |

|                               |  |  |
|-------------------------------|--|--|
| Payment of agricultural loans |  |  |
|-------------------------------|--|--|

\*Frequency: Annual-Monthly-Quarterly

**59. Has your property suffered from cattle rustling this year?** Yes ☐ No ☐

Heads per year \_\_\_\_\_

**60. Do you think the presence of ticks causes economic losses in your herd?** Yes ☐ No ☐

**61. What were the changes in your livestock and/or agricultural system due to the Covid-19 pandemic?** \_\_\_\_\_

**62. Based on the practices this exploitation is:** Extensive ☐ Intensive ☐ Semi intensive ☐
